# Supplementary material for: Mucin 5B promoter polymorphism is associated with idiopathic pulmonary fibrosis but not with development of lung fibrosis in systemic sclerosis or sarcoidosis
Source: HighWire-hosted journal article supplement (doi:10.1136/thoraxjnl-2012-201786), 2013-01-15

**Supplementary Table 1.** Genotype frequency in control and ILD patient cohorts

|                            | <b>GG</b> | <b>GT</b> | <b>TT</b> | <b>p value</b>         |
|----------------------------|-----------|-----------|-----------|------------------------|
| <b>Control</b> (n=416)     | 0.81      | 0.17      | 0.02      |                        |
| <b>IPF</b> (n=110)         | 0.38      | 0.53      | 0.09      | 9.11x10 <sup>-17</sup> |
| <b>SSc</b> (n=440)         | 0.78      | 0.22      | 0.01      | 0.09                   |
| <b>no ILD</b> (n=211)      | 0.80      | 0.19      | 0.01      | 0.57                   |
| <b>SSc-ILD</b> (n=229)     | 0.76      | 0.24      | 0.01      | 0.06                   |
| <b>Sarcoidosis</b> (n=180) | 0.79      | 0.20      | 0.01      | 0.58                   |
| <b>Stage 0-III</b> (n=98)  | 0.77      | 0.21      | 0.02      | 0.54                   |
| <b>Stage IV</b> (n=73)     | 0.82      | 0.18      | 0.00      | 0.53                   |

Data are presented as genotype frequency. p value is versus the control cohort. SSc: systemic sclerosis, ILD: interstitial lung disease

**Supplementary Figure 1.** Time to decline in FVC (panel A) and in DLco (panel B) in IPF patients, according to carriage of the MUC5B T allele. T allele non-carrier n=38, T allele carrier n=57. No significant difference in time to decline in FVC (HR: 0.78, 95% CI: 0.47-1.30, p=0.3), DLco (HR: 1.03, 95% CI: 0.61-1.73, p=0.9) was seen according to carriage of the disease-associated T allele on univariate analysis. However, after multivariate stepwise regression, leaving only significant covariates in the equation (CPI), the minor T allele was associated with a longer time to decline in FVC, just reaching the limits of statistical significance (HR: 0.59, 95% CI: 0.35-1.005, p=0.052), while no association was seen with time to decline in DLco (HR: 0.96, 95% CI: 0.56-1.62, p=0.9) even after adjustment for CPI.

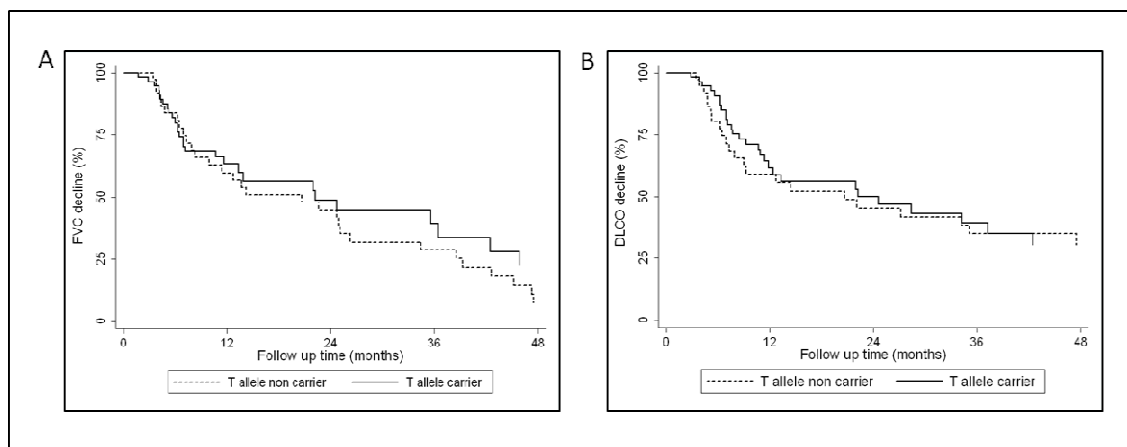

**Supplementary Figure 2.** Time to decline in FVC (panel A) and in DLco (panel B) in SSc-ILD patients, according to carriage of the MUC5B T allele. T allele non-carrier n=140, T allele carrier n=37. Time to decline in FVC, DLco, or either measure, did not correlate with carriage of the T allele, both on univariate (adjusted HR for time to decline in FVC: 1.16, 95% CI: 0.73-1.84, p=0.5, adjusted HR for time to decline in DLco: 1.46, 95% CI: 0.95-2.23, p=0.08), and multivariate stepwise regression analysis, after adjustment for age, gender, smoking status, and CPI (adjusted HR for time to decline in FVC: 1.16, 95% CI: 0.7-1.9, p=0.5, adjusted HR for time to decline in DLco: 1.19, 95% CI: 0.7-1.9, p=0.5).

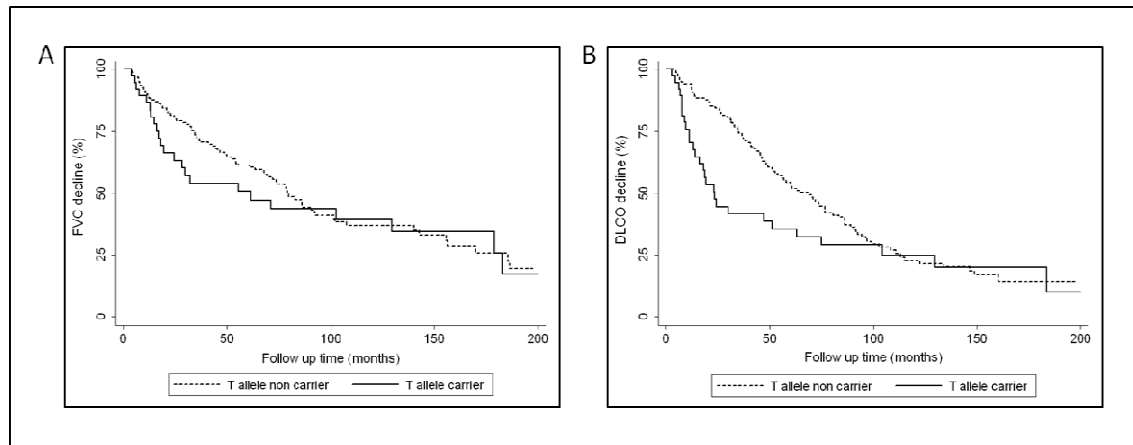

Supplement: thoraxjnl-2012-201786supp.pdf [file thoraxjnl-2012-201786supp.pdf]
